# Supplementary material
Source: HighWire-hosted journal article supplement (http://www.cmaj.ca/highwire/filestream/59137/field_highwire_adjunct_files/3/diet-salvado-2-at.pdf)
Supplement: diet-salvado-2-at.pdf [file diet-salvado-2-at.pdf]

**Appendix 2: Adherence to Mediterranean diet among study participants with metabolic syndrome at baseline (as supplied by the authors)**

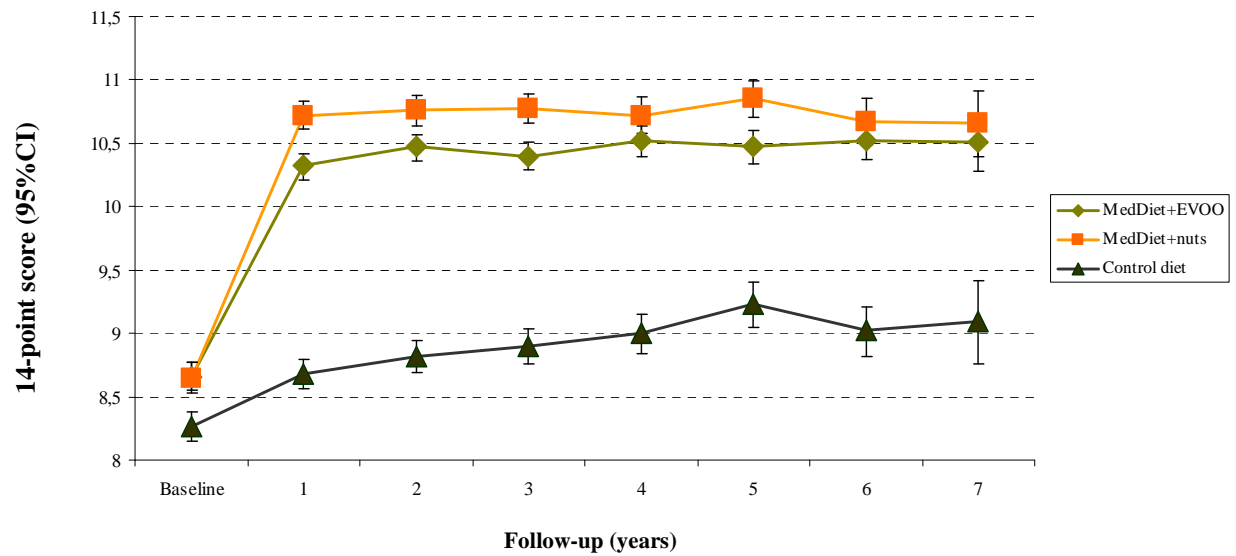

|                     | Baseline | 1 year | 2 years | 3 years | 4 years | 5 years | 6 years | 7 years |
|---------------------|----------|--------|---------|---------|---------|---------|---------|---------|
| <b>MedDiet+EVOO</b> | 1236     | 1169   | 1105    | 1054    | 874     | 754     | 580     | 237     |
| <b>MedDiet+nuts</b> | 1062     | 960    | 875     | 805     | 616     | 545     | 416     | 183     |
| <b>Control diet</b> | 1093     | 906    | 738     | 672     | 500     | 432     | 322     | 137     |

Appendix to: Mediterranean diets and metabolic syndrome status in the PREDIMED randomized trial. Babio N, ToledoE, Estruch R, et al. *CMAJ* 2014. DOI: 10.1503/cmaj.140764. Copyright © 2014 The Author(s) or their employer(s). To receive this resource in an accessible format, please contact us at [cmajgroup@cmaj.ca](mailto:cmajgroup@cmaj.ca).
